# Supplementary material
Source: PubMed Central journal article supplement (PMC8670512)
Supplement: pnas.2106623118.sapp.pdf [file pnas.2106623118.sapp.pdf]

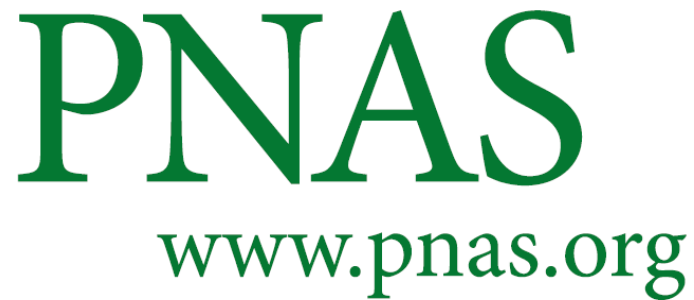

Supplementary Information for

**Title:**

aPC/PAR1 confers endothelial anti-apoptotic activity via a discrete  $\beta$ -arrestin-2 mediated SphK1-S1PR1-Akt signaling axis

**Author list**

Olivia Molinar-Inglis<sup>1</sup>, Cierra A. Birch<sup>1</sup>, Dequina Nicholas<sup>2</sup>, Lennis Orduña-Castillo<sup>1</sup>, Metztli Cisneros-Aguirre<sup>1</sup>, Anand Patwardhan<sup>1</sup>, Buxin Chen<sup>1</sup>, Neil J. Grimsey<sup>1,3</sup>, Luisa J. Coronel<sup>1</sup>, Huilan Lin<sup>1</sup>, Patrick K. Gomez Menzies<sup>1</sup>, Mark A. Lawson<sup>4</sup>, Hemal. H. Patel<sup>5</sup> and JoAnn Trejo<sup>1,6\*</sup>

**Corresponding Author**

JoAnn Trejo, PhD

Email: [joanntrejo@ucsd.edu](mailto:joanntrejo@ucsd.edu)

**Supplemental Figure 1**

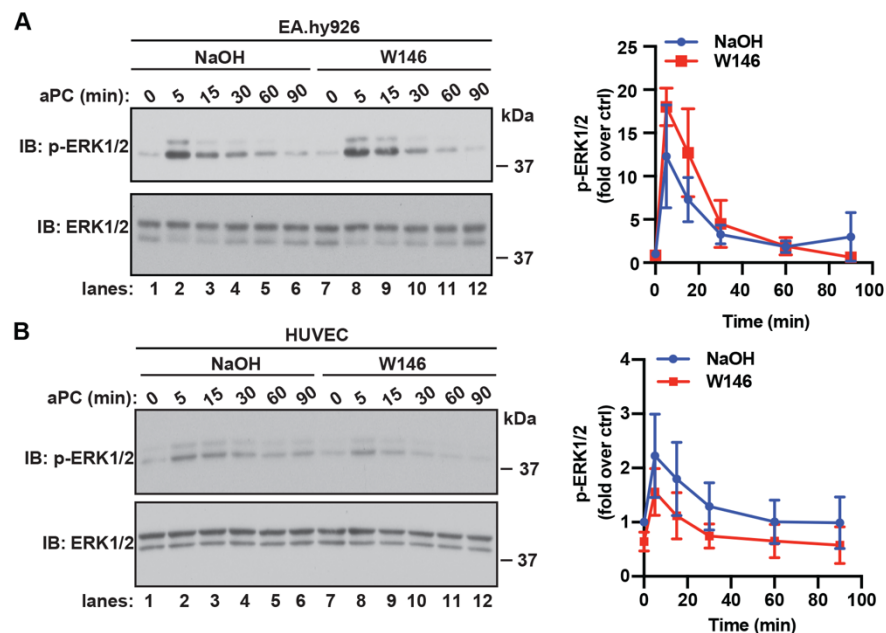

**Supplemental Figure 1. aPC-PAR1-induced ERK1/2 signaling is not dependent on S1PR1.**

(A) EA.hy926 cells were pretreated with 10  $\mu$ M W146 or NaOH vehicle 30 min, stimulated with or without 20 nM of aPC for various times. ERK1/2 and Phospho-ERK1/2 was detected by immunoblotting. (B) HUVECs were pretreated with W146 or NaOH and stimulated with aPC as described in A. Data (mean  $\pm$  S.D., n = 3) was analyzed by two-way ANOVA.

## Supplemental Figure 2

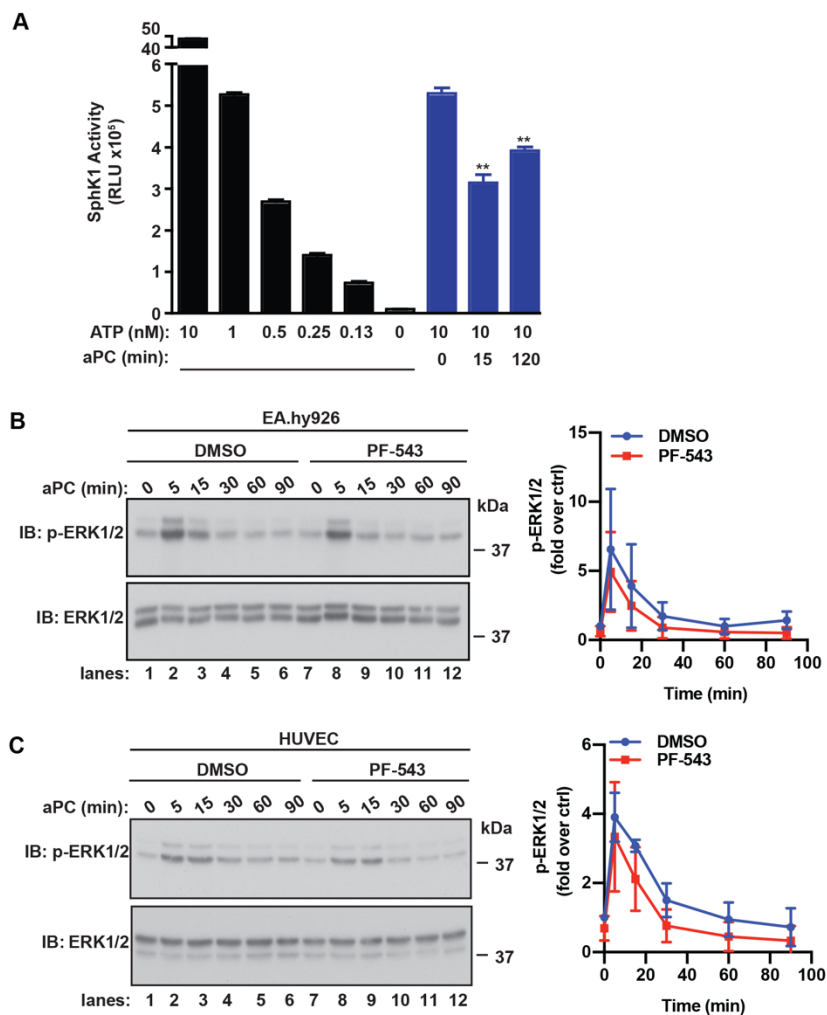

**Supplemental Figure 2. SphK1 activity ATP standard curve and SphK1 activity is not required for aPC-induced ERK1/2 activation.** (A) SphK1 activity luminescence assay is a measure of ATP depletion. A standard curve of ATP concentrations on SphK1 activity is shown on the left, *black bars*. On the right, EA.hy926 cells were stimulated with 20 nM aPC for various times and SphK1 activity was measured, *blue bars*. Data (mean  $\pm$  S.D.,  $n = 3$ ) was analyzed by Student's t-test. \*\*,  $P < 0.001$ . (B) EA.hy926 cells were pretreated with 100 nM PF-543 or DMSO and then stimulated with 20 nM of aPC for various times. ERK1/2 and phospho-ERK1/2 was detected by immunoblotting. Data (mean  $\pm$  S.D.,  $n = 3$ ) was analyzed by two-way ANOVA. (C) HUVECs pretreated with PF-543, stimulated with aPC were analyze as described in B.
